# Supplementary material for: Microtubule-associated protein 9 (Map9/Asap) is required for the early steps of zebrafish development
Source: PubMed Central journal article supplement — Cell Cycle. 2014 Feb 4;13(7):1101–14. doi: 10.4161/cc.27944 (PMC4013161; doi:10.4161/cc.27944), 2014-02-04
Supplement: cc-13-1101-s01.pdf [file cc-13-1101-s01.pdf]

## **Supplemental Material to:**

**Laura Fontenille, Sylvie Rouquier, Georges Lutfalla,  
and Dominique Giorgi**

**Microtubule-associated protein 9 (Map9/Asap) is required  
for the early steps of zebrafish development**

**Cell Cycle 2014; 13(7)**

**<http://dx.doi.org/10.4161/cc.27944>**

**<http://www.landesbioscience.com/journals/cc/article/27944>**

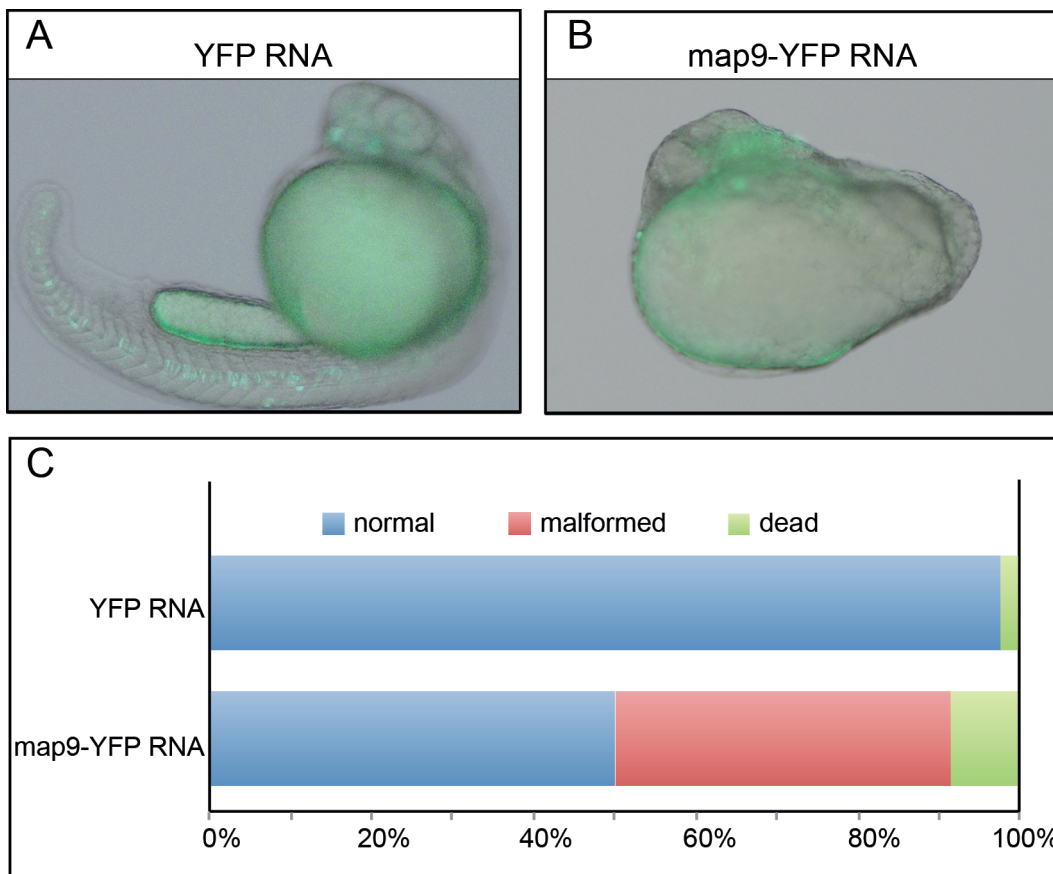

**Figure S1**

Map9 overexpression is associated with developmental defects and embryo death. (A-B) Embryos were injected with 400 pg YFP RNA, n=42 (A) or *map9*-YFP mRNA, n=36 (B) at the 1-cell stage and imaged at 24 hpf. Scale bars, 200  $\mu$ m. (C) Percentages of normal, malformed and dead embryos at 24 hpf.

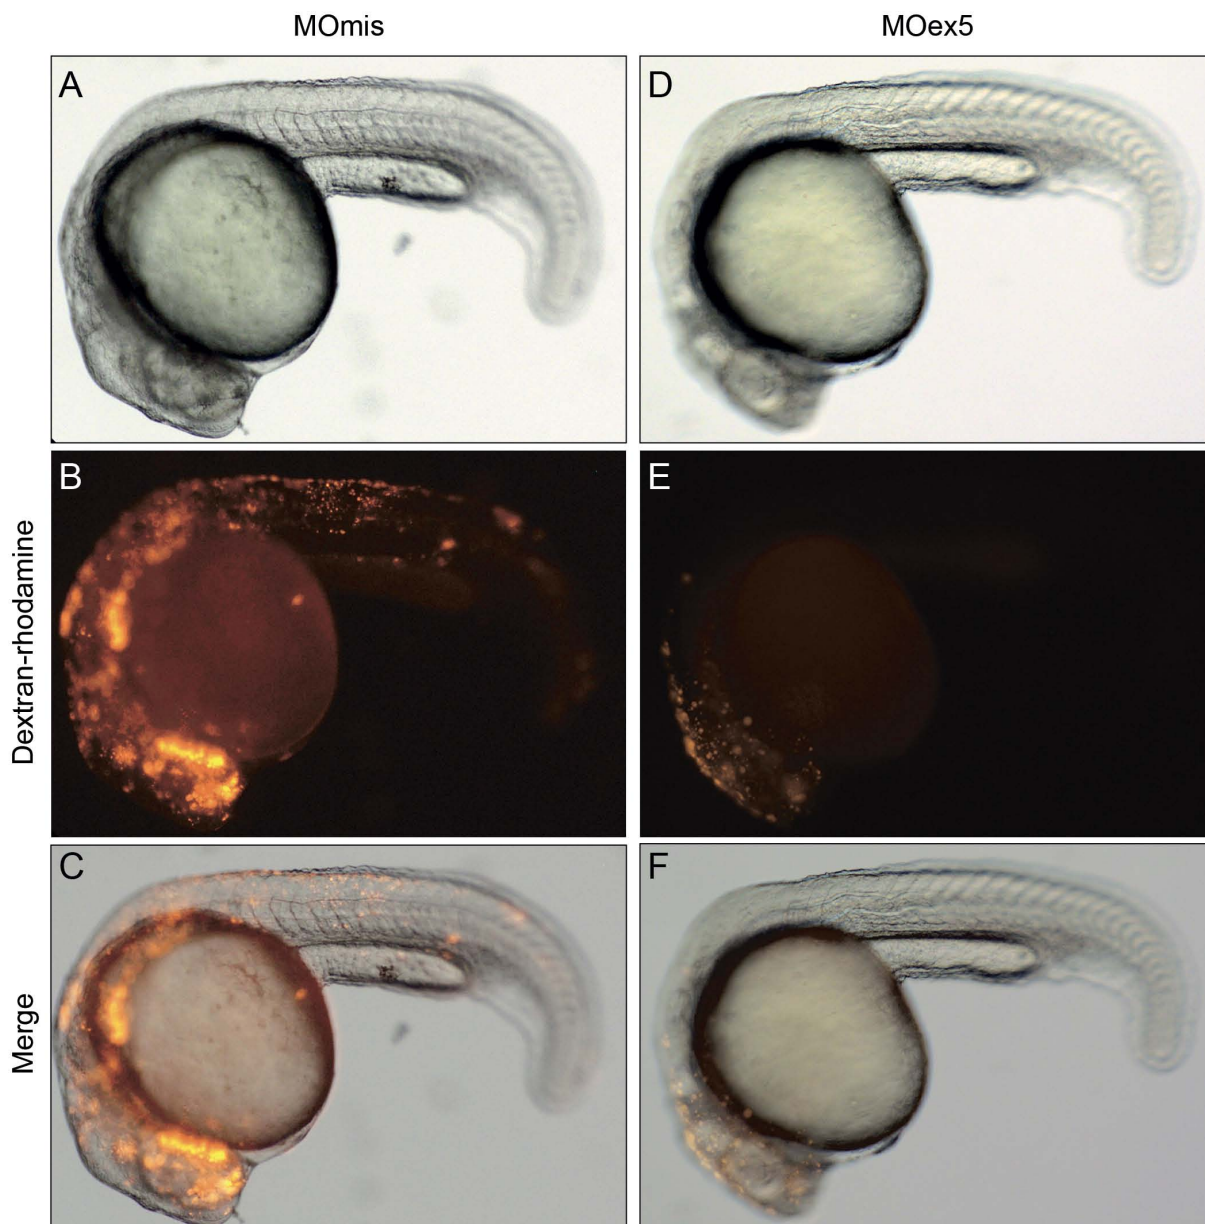

**Figure S2**

Morpholino-dependent depletion of *map9* in a random group of cells does not affect epiboly. One  $\mu\text{g}$  of MOex5 or control MOmis was co-injected with dextran-rhodamine (red) in a group of cells of 64-cell stage embryos. In contrast to embryos injected at the 1-cell stage (Figure 2) or injected directly in the YSL (Figure 6), these embryos do not exhibit developmental defects at 24 hpf.

| Primer name  | 5'-3' sequence            |
|--------------|---------------------------|
| map9 ZF1 fwd | ATGATGACGACGATATACTCA     |
| map9 ZF2 rev | TTAGTGGCAGTGGAGATTC       |
| map9 ZF8 rev | GCCCTCCTAGTAATTTCCAAG     |
| map9 ZF18F   | TCCAGTGCCATTGCCTTCAG      |
| map9 ZFjctR  | TTCTGTGGCAGCTGCTGACGAT    |
| map9 ZFovF   | TCTGTGGCAGCACTGCCAG       |
| map9 ZFdelR1 | TCTAACTGGCCAGTGTCACAC     |
| aurka fwd    | ATTGCAGATTTTTGGCTGGTC     |
| aurka rev    | TTCTCATCATGTGTTTTACCTTCAA |
| plk1 fwd     | GCCATTCACAAAAGTCTCG       |
| plk1 rev     | GCCCTCCTAGTAATTTCCAAG     |
| plk4 fwd     | AGGCCTCATTCTCGCTACC       |
| plk4 rev     | CTGCTGTGACCGCTCATGTCT     |
| shha fwd     | GCAGAAGAAGACATCCGAAGA     |
| shha rev     | GGCCAGTGGTTCATTACAGA      |
| smo fwd      | AATTGGCCATGTGGTCTG        |
| smo rev      | CTTCATTCTGGCAACCCTTAG     |
| igu fwd      | TCAATGCGGTGACGTTCTGT      |
| igu rev      | AAGGCCTTTTCACAATGTTGG     |
| gsc fwd      | AGAGACGACACCGAACCATTT     |
| gsc rev      | GATTCCTCTGACGACGACCTT     |
| oep fwd      | TTCGTTGGACTGACCGGAGTT     |
| oep rev      | ATCCCTGAGGCGTTCATCGTA     |
| sqt fwd      | CCGGACACTTCTGACTGGA       |
| sqt rev      | TCGCTTGCTGATATGGAGGAC     |
| cyc fwd      | CTGCTCGGAGTGTTCGGAAAG     |
| cyc rev      | GTCAAAGATCGCCACGTAG       |
| mezzo fwd    | GCTCACGCTGTTCCAGAGAG      |
| mezzo rev    | TGTGGCCAGGGATTCAGAG       |
| ntla fwd     | CCTCGGGTTCGTACTGTGAG      |
| ntla rev     | TCCGGAAGAGTTGTCCATGT      |
| sox17 fwd    | TCCGCTCTCAGACTCCAAAT      |
| sox17 rev    | AATCGCTTGTTTTCGTTTTACC    |
| sox32 fwd    | ACGAAAGAGGAGCGCAGA        |
| sox32 rev    | CATTGCTTTCCATGTCTTGC      |
| tarama fwd   | TCAACCTCCAGATTCCCAAT      |
| tarama rev   | CTACCGGACCCCAACTACCT      |
| charon fwd   | CACAAAAGCGAGCGAAAAA       |
| charon rev   | AGCCCTCCTCCGTTATGC        |
| dnah9 fwd    | CGCTTCAGGTCTGGAACACT      |
| dnah9 rev    | TGAGCCTCGGCTGCTATC        |
| lefty1 fwd   | CCAAGTGTGTCCACTTCACAA     |
| lefty1 rev   | TCACGGTCTTTGTTGTTTTCA     |
| lefty2 fwd   | CCACACAGGATCCAAAGGA       |
| lefty2 rev   | GCTGGAGTTACAGTTGCC        |
| spaw fwd     | GTCCTGAGCTTGATTGCACA      |
| spaw rev     | CGTCTGGATGCAGAAAAC        |
| foxa2 fwd    | CAAAATGGAGGGACACGAAC      |
| foxa2 rev    | TGTTGCTGACCGAGGTGTAA      |
| nipblA fwd   | GAGGCTCCAGTCCCAAGAAT      |
| nipblA rev   | CCGGTTCTCCTTGACTTCC       |
| nipblB fwd   | GCTGACGGAGCAGTACTACGA     |
| nipblB rev   | TGATCACCCCTCTTCCTCACA     |
| bon fwd      | TTTTTCCAAACGCGGATATG      |
| bon rev      | TCCTGAAGCGCATAATCTGA      |
| gata5 fwd    | GGACGCCAGGGAACCTCTAC      |
| gata5 rev    | ACACGGCAGGTCATCCAG        |
| eomesa fwd   | CAAAAGGCTTCAGGGACAAAT     |
| eomesa rev   | AGTAGGAGAGGGCGTCAGTCT     |
| eomesb fwd   | CGCGAACATCAACACTTCA       |
| eomesb rev   | GTCGTCCGACACCTCCAC        |

**Table S1**

Sequences of the primer pairs used to quantify gene expression by qPCR.
